# Supplementary material
Source: publisher figshare collection journal article supplement (https://frontiersin.figshare.com/ndownloader/files/24677729)
Supplement: Supplementary file [file 24677729]

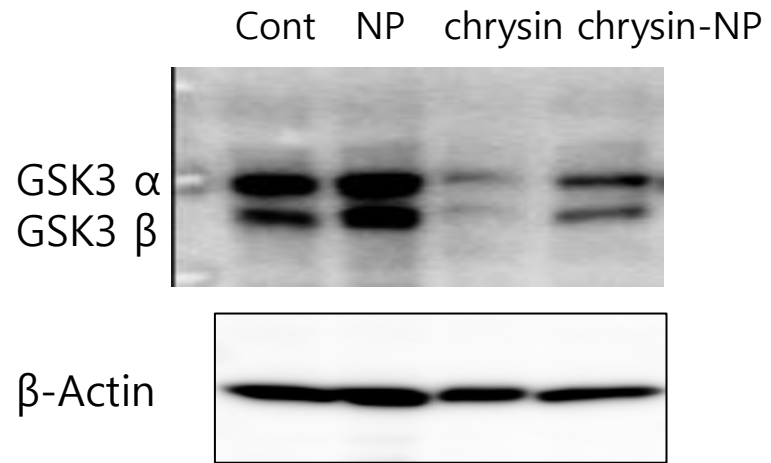

**Supplementary Figure 1.** Decline of GSK-3b expression by chrysin-NP in MDA-MB-231 cells. The condition of samples is equal to that in Figure 2.
